# Supplementary material for: Triple oxygen isotopes indicate urbanization affects sources of nitrate in wet and dry atmospheric deposition
Source: Copernicus journal article supplement (doi:10.5194/acp-18-6381-2018), 2018-05-04
Supplement: Supplementary file 1 [file acp-18-6381-2018-supplement.pdf]

Supplement of Atmos. Chem. Phys., 18, 6381–6392, 2018  
<https://doi.org/10.5194/acp-18-6381-2018-supplement>  
© Author(s) 2018. This work is distributed under  
the Creative Commons Attribution 4.0 License.

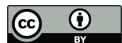

*Supplement of*

## **Triple oxygen isotopes indicate urbanization affects sources of nitrate in wet and dry atmospheric deposition**

**David M. Nelson et al.**

*Correspondence to:* David M. Nelson (dnelson@umces.edu)

The copyright of individual parts of the supplement might differ from the CC BY 4.0 License.

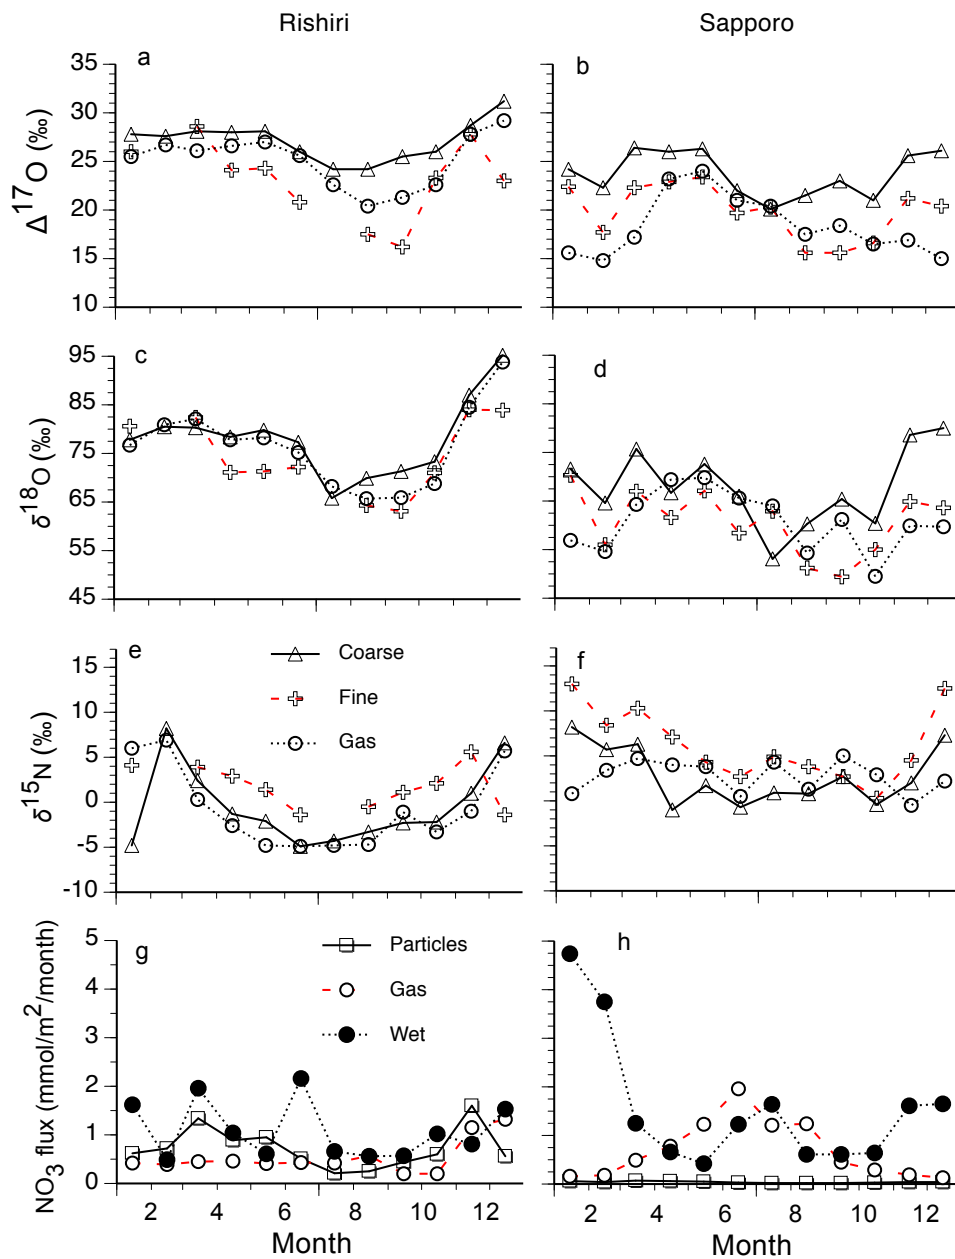

**Figure S1.** Time series of monthly weighted-average a, b)  $\Delta^{17}\text{O}$  values of nitrate in coarse and fine particles and in gaseous form, c, d)  $\delta^{18}\text{O}$  values of nitrate in coarse and fine particles and in gaseous form, e, f)  $\delta^{15}\text{N}$  values of nitrate in coarse and fine particles and gaseous form, and g, h) fluxes of particulate nitrate, gaseous nitrate, and wet nitrate. Data from Rishiri (rural) are in left column and data from Sapporo (urban) are in right column.
